# Supplementary material
Source: ML conference proceedings conference paper supplement (https://openreview.net/forum?id=xZnjIkIzST)
Supplement: supplementary_material [file sup.pdf › sup/sup.pdf]

# Restore3D: Breathing Life into Broken Objects with Shape and Texture Restoration

Anonymous Author(s)

Affiliation

Address

email

## A Supplementary Material

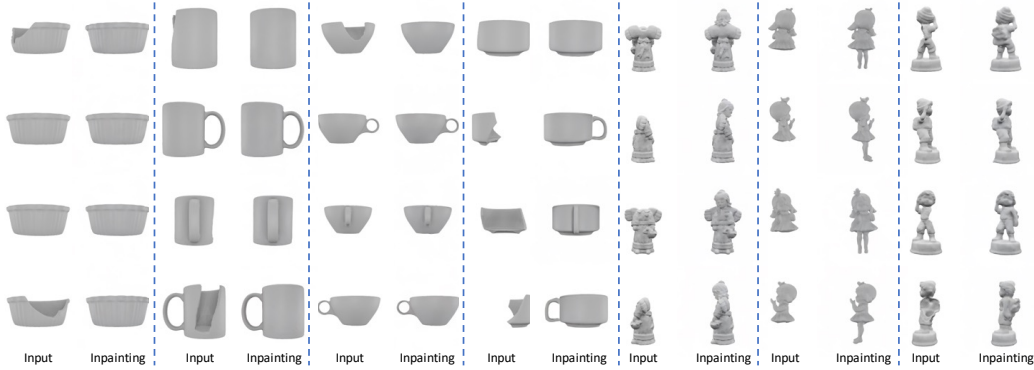

Figure 1: Real-world cases.

Table 1: Results of Fantastic Breaks.

| Method     | PSNR $\uparrow$ | LPIPS $\downarrow$ | SSIM $\uparrow$ |
|------------|-----------------|--------------------|-----------------|
| SD         | 12.59           | 0.72               | 0.40            |
| Controlnet | 15.63           | 0.55               | 0.56            |
| Nerfiller  | 18.94           | 0.52               | 0.81            |
| Ours       | <b>26.91</b>    | <b>0.09</b>        | <b>0.97</b>     |

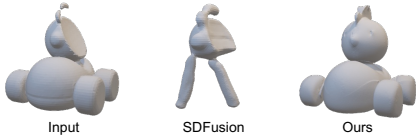

Figure 2: Visual comparison

Table 2: Comparison with shape completion methods.

| Method   | CD $\downarrow$ | F-score $\uparrow$ |
|----------|-----------------|--------------------|
| SDFusion | 0.015           | 0.096              |
| Ours     | <b>0.005</b>    | <b>0.389</b>       |

### A.1 Object restoration for real-world cases.

We test our inpainting model on Fantastic Breaks [2] which has 150 real-world paired broken-complete cases. As shown in Fig. 1 and Table 1, the qualitative and quantitative results also show that our model can yield promising results.

### A.2 Comparison with shape completion methods

We compare our method with SDFusion [1], a shape completion method. As shown in Table 2 and Fig. 2, the results show that our method outperforms SDFusion.

## 9 References

- 10 [1] Yen-Chi Cheng, Hsin-Ying Lee, Sergey Tulyakov, Alexander G Schwing, and Liang-Yan Gui. Sdfusion:  
11 Multimodal 3d shape completion, reconstruction, and generation. In *CVPR*, 2023.
- 12 [2] Nikolas Lamb, Cameron Palmer, Benjamin Molloy, Sean Banerjee, and Natasha Kholgade Banerjee.  
13 Fantastic breaks: A dataset of paired 3d scans of real-world broken objects and their complete counterparts.  
14 In *Proceedings of the IEEE/CVF Conference on Computer Vision and Pattern Recognition (CVPR)*, pages  
15 4681–4691, June 2023.
